# Supplementary material for: Increased Prolylcarboxypeptidase Expression Can Serve as a Biomarker of Senescence in Culture
Source: MDPI journal article supplement (doi:10.3390/molecules29102219), 2024-05-09
Supplement: s1 [file s1]

Supplementary Material File S1. Western blot

Figure 2A original blot

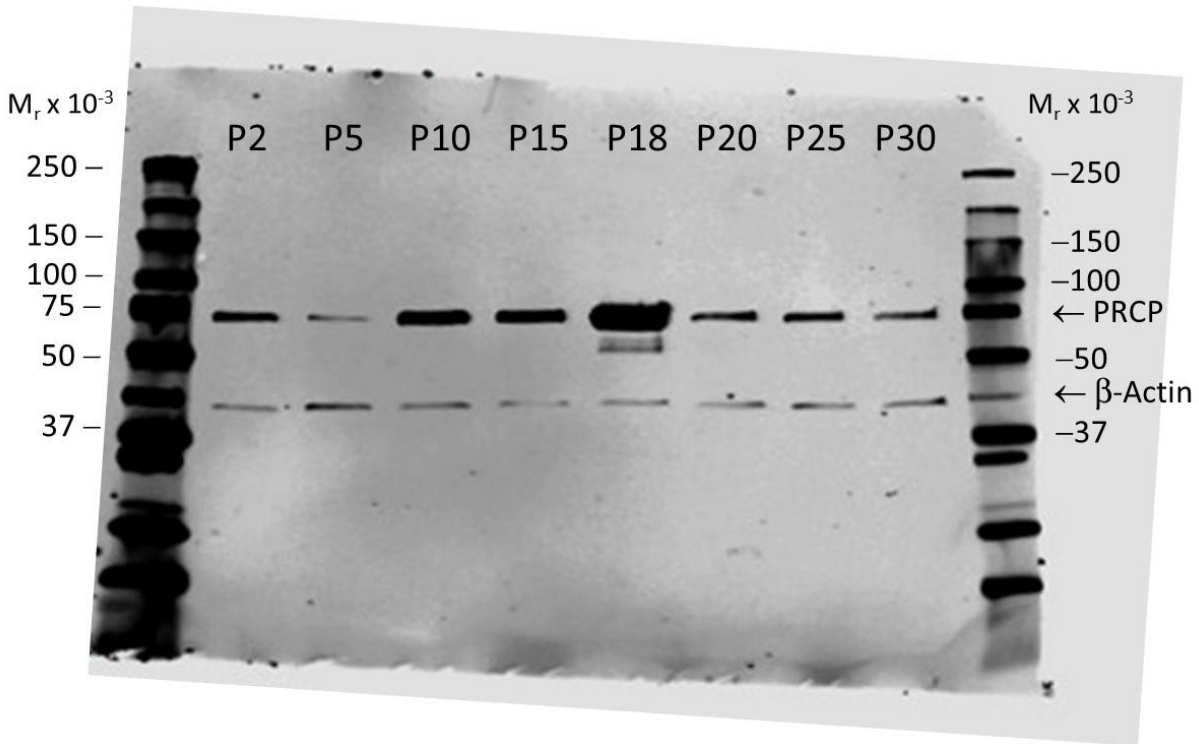

**Figure S1. Immunoblot analysis of PRCP protein expression in various HPAE cell passages (P2-P30).** HPAECs were homogenized in lysis buffer containing protein inhibitor cocktail. Lysates (100  $\mu$ g/lane) were resolved on 4-20% SDS-PAGE and then transferred on to nitrocellulose membrane.  $\beta$ -Actin was used as endogenous control. PRCP and  $\beta$ -actin were detected by a conventional chemiluminescent method using anti-PRCP and anti- $\beta$ -actin antibodies.
